# Supplementary material for: LiRb2PO4: a new deep-ultraviolet nonlinear optical phosphate with a large SHG response
Source: Royal Society of Chemistry journal article supplement (doi:10.1039/c6tc04565k), 2016-11-21
Supplement: c6tc04565k2.pdf [file c6tc04565k2.pdf]

## SUPPORTING INFORMATION

### **LiRb<sub>2</sub>PO<sub>4</sub>: A New Deep-Ultraviolet Nonlinear Optical Phosphate with a Large SHG Response**

*Lin Li<sup>a</sup>, Ying Wang<sup>a</sup>, Bing-Hua Lei<sup>a,b</sup>, Shujuan Han<sup>a,\*</sup>, Zihua Yang<sup>a</sup>, Hongyi Li<sup>a</sup>,  
Shilie Pan<sup>a,\*</sup>*

*a. Xinjiang Key Laboratory of Functional Materials and Devices for Special  
Environments, Xinjiang Technical Institute of Physics & Chemistry, Chinese  
Academy of Sciences, 40-1 South Beijing Road, Urumqi 830011, China. E-mail:  
slpan@ms.xjb.ac.cn; Tel: +86-991-3674558.*

*b. University of Chinese Academy of Sciences, Beijing 100049, China*

## CONTENTS

|                                                   |    |
|---------------------------------------------------|----|
| <b>1. Crystal Data</b> .....                      | 3  |
| <b>2. PXRD Pattern</b> .....                      | 5  |
| <b>3. Crystal Structure</b> .....                 | 6  |
| <b>4. IR spectrum</b> .....                       | 7  |
| <b>5. Electronic Structure Calculations</b> ..... | 8  |
| <b>6. Dipole Moments Calculation</b> .....        | 10 |

## 1. Crystal Data

**Table S1.** Atomic coordinates ( $\times 10^4$ ) and equivalent isotropic displacement parameters ( $\text{\AA}^2 \times 10^3$ ) for  $\text{LiRb}_2\text{PO}_4$ .  $U_{(\text{eq})}$  is defined as one third of the trace of the orthogonalized  $U_{ij}$  tensor.

| Atom | x       | y        | z        | $U_{(\text{eq})}$ | BVS    |
|------|---------|----------|----------|-------------------|--------|
| Li1  | 5000    | 2056(14) | 274(18)  | 12(3)             | 1.0785 |
| Rb1  | 0       | 1061(1)  | -2074(1) | 15(1)             | 0.9727 |
| Rb2  | 0       | 4359(1)  | -577(1)  | 16(1)             | 1.0748 |
| P1   | 0       | 1931(2)  | 2391(2)  | 8(1)              | 4.9240 |
| O1   | 0       | 1344(5)  | 4197(8)  | 12(1)             | 2.1146 |
| O2   | 0       | 3281(5)  | 2711(7)  | 14(1)             | 2.1044 |
| O3   | 2232(8) | 1567(4)  | 1394(6)  | 18(1)             | 2.0606 |

**Table S2.** Selected Bond Distances(Å)and Angles (deg) for LiRb<sub>2</sub>PO<sub>4</sub>.

| LiRb <sub>2</sub> PO <sub>4</sub>      |            |                                          |            |
|----------------------------------------|------------|------------------------------------------|------------|
| Li1-O3                                 | 1.866(10)  | Rb2-O2                                   | 2.825(6)   |
| Li1-O3* <sup>1</sup>                   | 1.866(10)  | Rb2-O1* <sup>8</sup>                     | 2.928(4)   |
| Li1-O1* <sup>2</sup>                   | 1.999(17)  | Rb2-O1* <sup>2</sup>                     | 2.928(4)   |
| Li1-O2* <sup>2</sup>                   | 2.021(16)  | Rb2-O2* <sup>12</sup>                    | 2.988(6)   |
|                                        |            | Rb2-O3* <sup>10</sup>                    | 3.005(5)   |
| Rb1-O1* <sup>6</sup>                   | 2.902(6)   | Rb2-O3* <sup>2</sup>                     | 3.005(5)   |
| Rb1-O1* <sup>7</sup>                   | 2.906(7)   | Rb2-O3* <sup>14</sup>                    | 3.322(5)   |
| Rb1-O2* <sup>2</sup>                   | 2.914(4)   | Rb2-O3* <sup>13</sup>                    | 3.322(5)   |
| Rb1-O2* <sup>8</sup>                   | 2.914(4)   |                                          |            |
| Rb1-O3                                 | 3.020(6)   | P1-O3* <sup>9</sup>                      | 1.530(5)   |
| Rb1-O3* <sup>9</sup>                   | 3.020(6)   | P1-O3                                    | 1.530(5)   |
| Rb1-O3* <sup>2</sup>                   | 3.328(5)   | P1-O1                                    | 1.548(6)   |
| Rb1-O3* <sup>10</sup>                  | 3.328(5)   | P1-O2                                    | 1.553(6)   |
| Rb1-O3* <sup>6</sup>                   | 3.447(6)   |                                          |            |
| Rb1-O3* <sup>11</sup>                  | 3.447(6)   | O2-Rb2-O1* <sup>8</sup>                  | 86.33(12)  |
|                                        |            | O2-Rb2-O1* <sup>2</sup>                  | 86.33(12)  |
| O3* <sup>1</sup> -Li1-O1* <sup>2</sup> | 117.7(5)   | O1* <sup>8</sup> -Rb2-O1* <sup>2</sup>   | 147.6(2)   |
| O3-Li1-O2* <sup>2</sup>                | 113.6(5)   | O2-Rb2-O2* <sup>12</sup>                 | 142.00(15) |
| O3* <sup>1</sup> -Li1-O2* <sup>2</sup> | 113.6(5)   | O1* <sup>8</sup> -Rb2-O2* <sup>12</sup>  | 102.57(11) |
| O1* <sup>6</sup> -Rb1-O1* <sup>7</sup> | 116.17(14) | O1* <sup>2</sup> -Rb2-O2* <sup>12</sup>  | 102.57(11) |
| O1* <sup>6</sup> -Rb1-O2* <sup>2</sup> | 105.09(10) | O2-Rb2-O3* <sup>10</sup>                 | 123.50(14) |
| O1* <sup>7</sup> -Rb1-O2* <sup>2</sup> | 85.13(11)  | O1* <sup>8</sup> -Rb2-O3* <sup>10</sup>  | 50.24(15)  |
| O1* <sup>6</sup> -Rb1-O2* <sup>8</sup> | 105.09(10) | O1* <sup>2</sup> -Rb2-O3* <sup>10</sup>  | 110.81(14) |
| O1* <sup>7</sup> -Rb1-O2* <sup>8</sup> | 85.13(11)  | O2* <sup>12</sup> -Rb2-O3* <sup>10</sup> | 88.13(14)  |
| O2* <sup>2</sup> -Rb1-O2* <sup>8</sup> | 149.6(2)   | O2-Rb2-O1* <sup>8</sup>                  | 86.33(12)  |
| O1* <sup>6</sup> -Rb1-O3               | 82.96(15)  | O2-Rb2-O1* <sup>2</sup>                  | 86.33(12)  |
| O1* <sup>7</sup> -Rb1-O3               | 149.65(11) | O1* <sup>8</sup> -Rb2-O1* <sup>2</sup>   | 147.6(2)   |
| O2* <sup>2</sup> -Rb1-O3               | 66.48(14)  | O2-Rb2-O2* <sup>12</sup>                 | 142.00(15) |
| O2* <sup>8</sup> -Rb1-O3               | 113.77(14) | O1* <sup>8</sup> -Rb2-O2* <sup>12</sup>  | 102.57(11) |
|                                        |            | O1* <sup>8</sup> -Rb2-O3* <sup>2</sup>   | 110.81(14) |
| O3* <sup>9</sup> -P1-O3                | 110.2(4)   | O1* <sup>2</sup> -Rb2-O3* <sup>2</sup>   | 50.24(15)  |
| O3* <sup>9</sup> -P1-O1                | 109.8(2)   | O2* <sup>12</sup> -Rb2-O3* <sup>2</sup>  | 88.13(14)  |
| O3-P1-O1                               | 109.8(2)   | O3* <sup>10</sup> -Rb2-O3* <sup>2</sup>  | 62.40(19)  |
| O3* <sup>9</sup> -P1-O2                | 110.3(2)   | O1* <sup>8</sup> -Rb2-O3* <sup>2</sup>   | 110.81(14) |
| O3-P1-O2                               | 110.3(2)   | O1* <sup>2</sup> -Rb2-O3* <sup>2</sup>   | 50.24(15)  |

Symmetry transformations used to generate equivalent atoms:

\*1) -x+2, -y+1, z-1/2; \*2) x, y, z-1; \*3) -x+5/2, -y+3/2, z-1/2; \*4) -x+3/2, -y+3/2, z-1/2;

\*5) -x+2, y, z; \*6) x+1/2, -y+3/2, z-1/2; \*7) x, -y+1, z-1/2; \*8) -x+2, -y+2, z-1/2;

\*9) x+1/2, y+1/2, z; \*10) -x+3/2, y+1/2, z; \*11) -x+1, y, z.

\*1) -x+1, y, z; \*2) -x+3/2, -y+3/2, z-1/2; \*3) -x+5/2, -y+3/2, z-1/2;

\*4) x+1/2, -y+3/2, z-1/2; \*5) -x+2, -y+1, z-1/2; \*6) -x+2, y, z; \*7) -x+2, -y+2, z-1/2; \*8) x, y, z-1.

## 2. PXRD Pattern

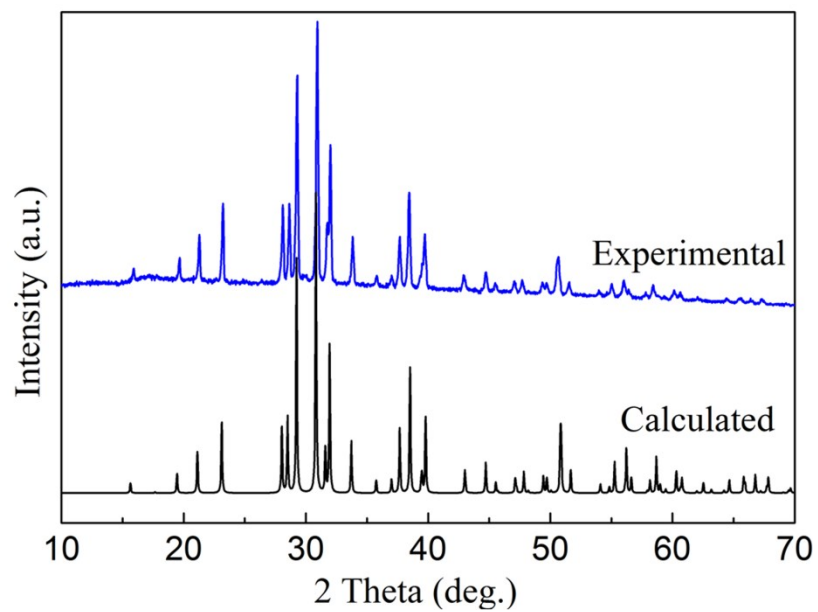

**Figure S1.** Experimental and calculated XRD patterns for  $\text{LiRb}_2\text{PO}_4$ .

### 3. Crystal Structure

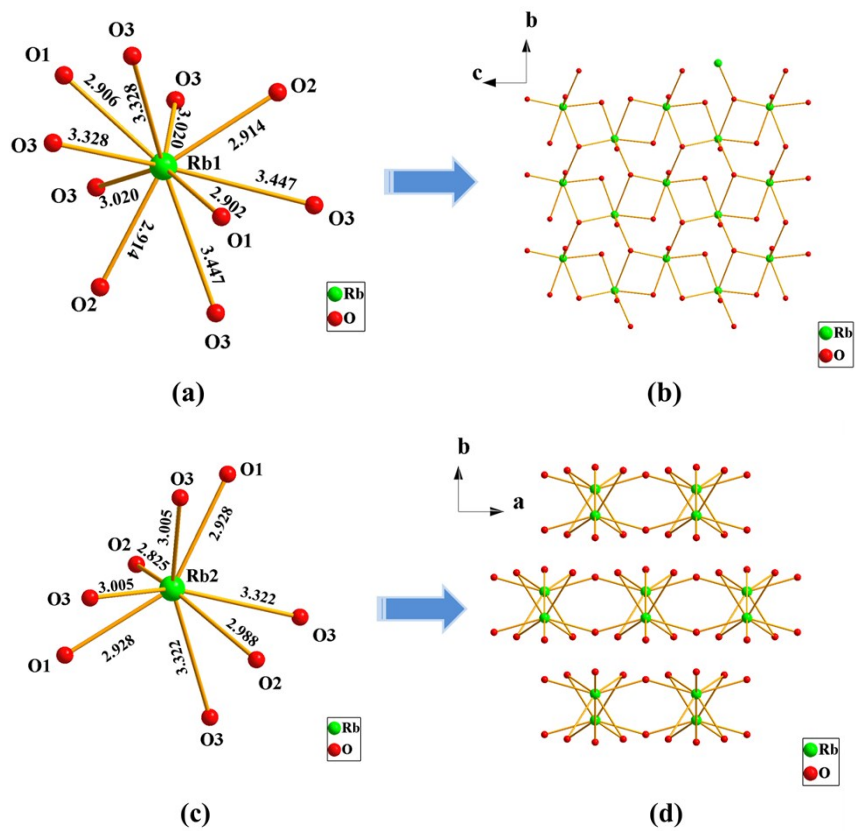

**Figure S2.** The coordination environments of the Rb1 atoms (a and b); the Rb2 atoms (c and d).

#### 4. IR spectrum

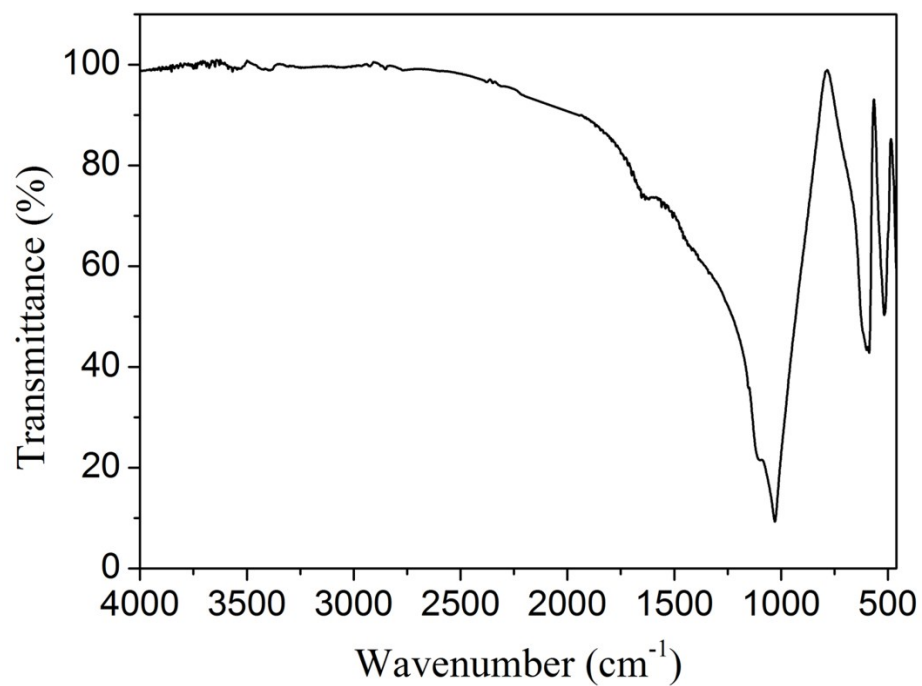

**Figure S3.** IR spectrum of LRPO.

## 5. Electronic Structure Calculations

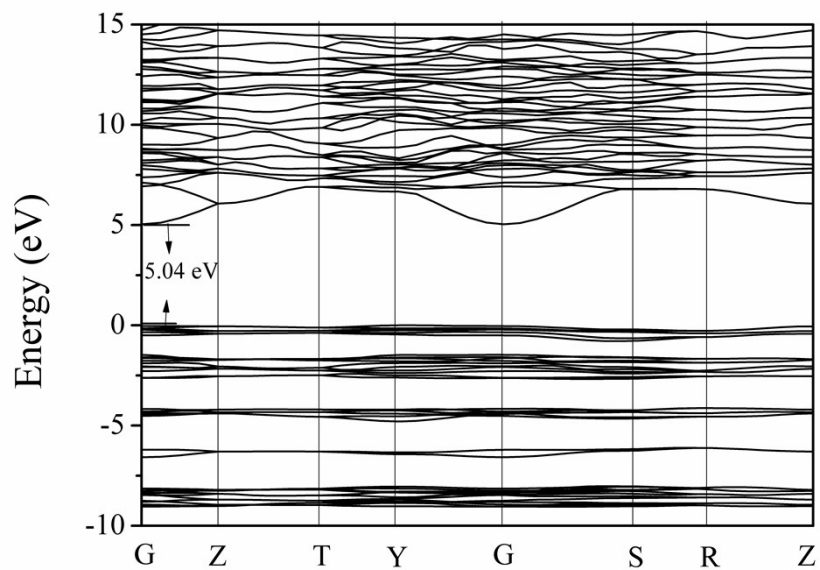

**Figure S4.** Band structure of LRPO.

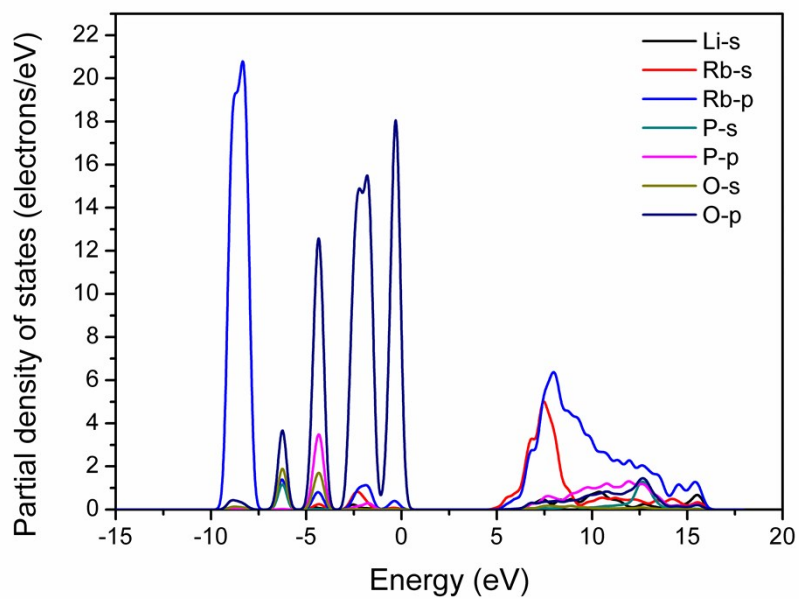

**Figure S5.** Partial density of states in LRPO.



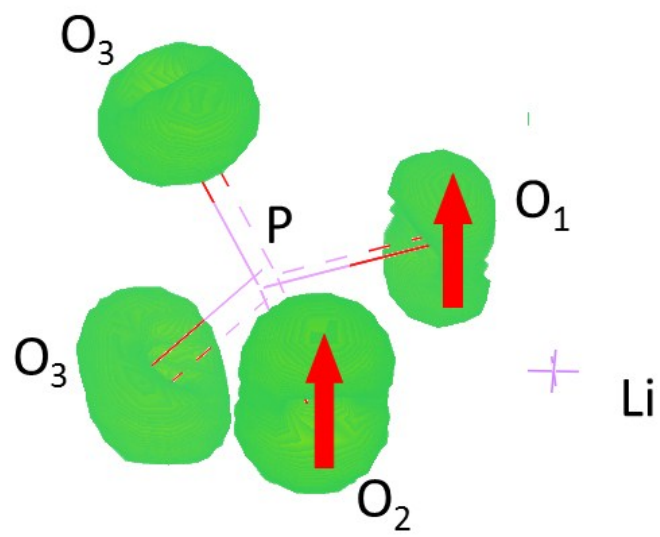

**Figure S6.** The orientation of the O-2p orbital based on orbital analysis

## 6. Dipole Moments Calculation

**Table S3.** Calculation of the dipole moments for the PO<sub>4</sub> and LiO<sub>4</sub> and RbO<sub>n</sub> (n = 8, 10) polyhedra in LRPO.

|                     | Dipole Moment (Debye) |            |            | Total (Debye) |
|---------------------|-----------------------|------------|------------|---------------|
|                     | <i>x/a</i>            | <i>y/b</i> | <i>z/c</i> |               |
| PO <sub>4</sub>     | 0                     | -0.25      | 0.88       | 0.92          |
|                     | 0                     | -0.25      | 0.88       | 0.92          |
|                     | 0                     | -0.25      | 0.88       | 0.92          |
|                     | 0                     | 0.25       | 0.88       | 0.92          |
|                     | 0                     | 0.25       | 0.88       | 0.92          |
|                     | 0                     | 0.25       | 0.88       | 0.92          |
| SUM                 | 0                     | 0.00       | 5.31       | 5.31          |
| Net Dipole Moments* | 3.54                  |            |            |               |
|                     | Dipole Moment (Debye) |            |            | Total (Debye) |
|                     | <i>x/a</i>            | <i>y/b</i> | <i>z/c</i> |               |
| LiO <sub>4</sub>    | 0                     | -1.24      | -4.37      | 4.54          |
|                     | 0                     | -1.24      | -4.37      | 4.54          |
|                     | 0                     | -1.23      | -4.37      | 4.54          |
|                     | 0                     | 1.23       | -4.37      | 4.54          |
|                     | 0                     | 1.23       | -4.37      | 4.54          |
|                     | 0                     | 1.23       | -4.37      | 4.54          |
| SUM                 | 0                     | 0.00       | -26.25     | 26.25         |
| Net Dipole Moments* | 17.5                  |            |            |               |
|                     | Dipole Moment (Debye) |            |            | Total (Debye) |
|                     | <i>x/a</i>            | <i>y/b</i> | <i>z/c</i> |               |
| Rb1O <sub>10</sub>  | 0                     | 0.17       | -1.14      | 1.15          |
|                     | 0                     | 0.12       | -0.93      | 0.93          |
|                     | 0                     | 0.12       | -0.93      | 0.93          |
|                     | 0                     | 0.12       | -0.93      | 0.93          |
|                     | 0                     | -0.12      | -0.93      | 0.93          |
|                     | 0                     | -0.17      | -1.13      | 0.93          |
| SUM                 | 0                     | 0.25       | -5.97      | 5.97          |
| Net Dipole Moments  | 3.98                  |            |            |               |
|                     | Dipole Moment (Debye) |            |            | Total (Debye) |
|                     | <i>x/a</i>            | <i>y/b</i> | <i>z/c</i> |               |
| Rb2O <sub>8</sub>   | 0                     | -1.92      | -1.26      | 2.3           |
|                     | 0                     | 3.34       | -5.14      | 6.13          |
|                     | 0                     | 1.92       | -1.26      | 2.3           |
|                     | 0                     | -1.92      | -1.26      | 2.3           |
|                     | 0                     | -1.92      | -1.26      | 2.3           |

|                    |   |      |        |       |
|--------------------|---|------|--------|-------|
|                    | 0 | 1.92 | -1.26  | 2.3   |
| SUM                | 0 | 0.00 | -11.45 | 11.54 |
| Net Dipole Moments |   |      | 7.69   |       |

\*There are four PO<sub>4</sub> in the crystal cell.

**Table S4.** Calculation of the dipole moments for the PO<sub>4</sub> polyhedra in LCPO.

|                    | Dipole Moment (Debye) |            |            | Total (Debye) |
|--------------------|-----------------------|------------|------------|---------------|
|                    | <i>x/a</i>            | <i>y/b</i> | <i>z/c</i> |               |
| PO <sub>4</sub>    | 0                     | -0.44      | 0.95       | 1.05          |
|                    | 0                     | -0.44      | 0.95       | 1.05          |
|                    | 0                     | -0.44      | 0.95       | 1.05          |
|                    | 0                     | 0.44       | 0.95       | 1.05          |
|                    | 0                     | 0.44       | 0.95       | 1.05          |
|                    | 0                     | 0.44       | 0.95       | 1.05          |
| SUM                | 0                     | 0.00       | 5.70       | 5.70          |
| Net Dipole Moments |                       |            | 3.8        |               |

\*There are four PO<sub>4</sub> in the crystal cell.

**Table S5.** Calculation of the dipole moments for the PO<sub>4</sub> polyhedra in RbBa<sub>2</sub>(PO<sub>3</sub>)<sub>5</sub>.

|                     | Dipole Moment (Debye) |            |            | Total (Debye) |
|---------------------|-----------------------|------------|------------|---------------|
|                     | <i>x/a</i>            | <i>y/b</i> | <i>z/c</i> |               |
| PO <sub>4</sub>     | 4.23                  | 4.02       | 2.43       | 6.32          |
|                     | 4.23                  | -4.02      | 2.43       | 6.32          |
|                     | -0.29                 | 4.25       | 0.04       | 4.26          |
|                     | -0.29                 | -4.25      | 0.04       | 4.26          |
|                     | -5.63                 | 2.72       | -3.17      | 7.01          |
|                     | -5.63                 | 2.72       | -3.17      | 7.01          |
|                     | 2.11                  | 0.88       | -2.18      | 3.96          |
|                     | 2.11                  | -0.88      | -2.18      | 3.96          |
|                     | -2.65                 | -1.99      | -2.50      | 4.15          |
|                     | -2.65                 | 1.99       | -2.50      | 4.15          |
| SUM                 | -4.45                 | 5.44       | -10.78     | 12.87         |
| Net Dipole Moments* |                       |            | 12.87      |               |

\*There are ten PO<sub>4</sub> in the crystal cell.
